# Supplementary material for: Efficient Physical Mixing of Small Amounts of Nanosilica Dispersion and Waterborne Polyurethane by Using Mild Stirring Conditions
Source: MDPI journal article supplement (doi:10.3390/polym14235136), 2022-11-25
Supplement: s1 [file s1]

## Supplementary data

### *Efficient Physical Mixing of Small Amounts of Nanosilica Dispersion and*

### *Waterborne Polyurethane by Using Mild Stirring Conditions*

*María Echarri-Giacchi and José Miguel Martín-Martínez*

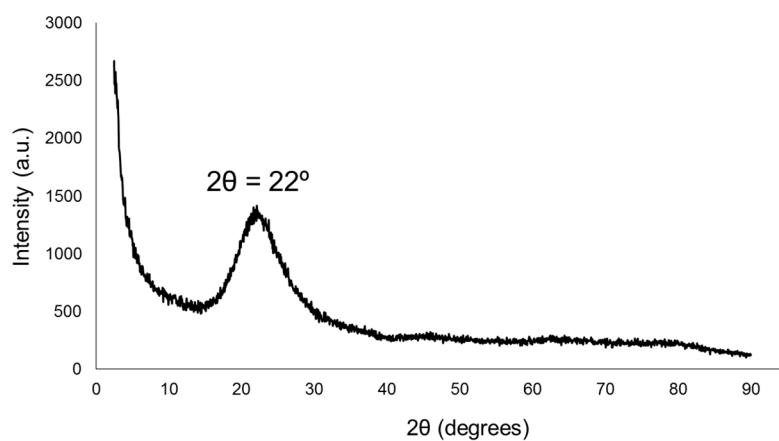

**Figure S1.** Wide angle X-ray diffractogram of the nanosilica powder.

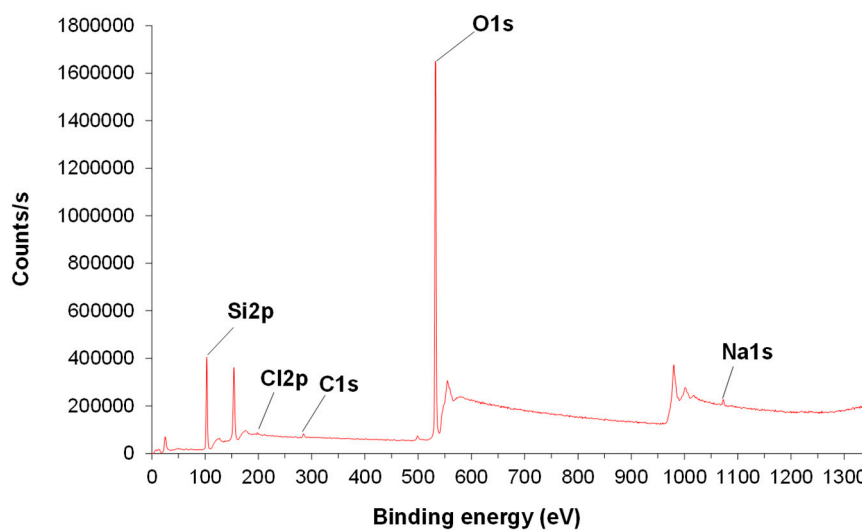

**Figure S2.** Survey XPS spectrum of the nanosilica powder surface.

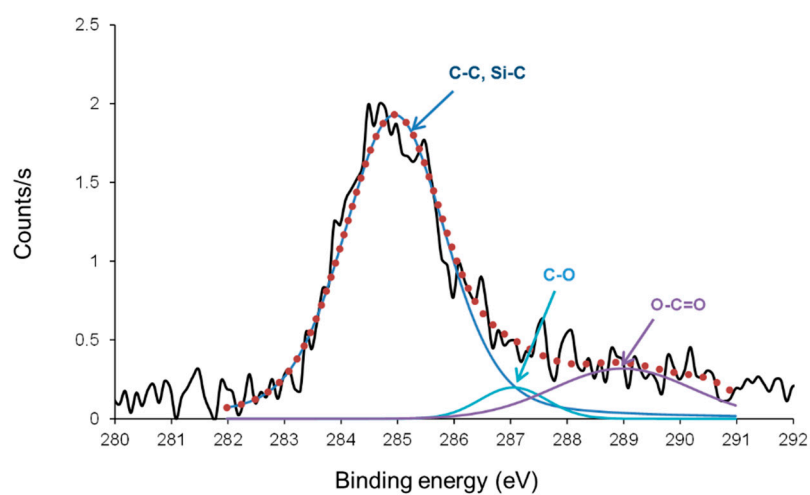

**Figure S3.** High resolution C1s spectra of the nanosilica powder surface. XPS experiment.

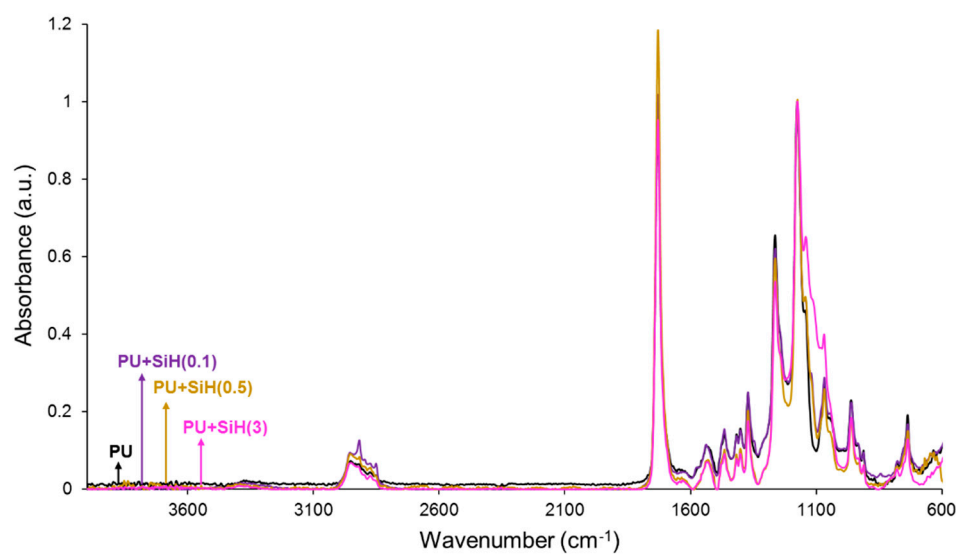

**Figure S4.** ATR-IR spectra of the PU and PU+nanosilica materials.

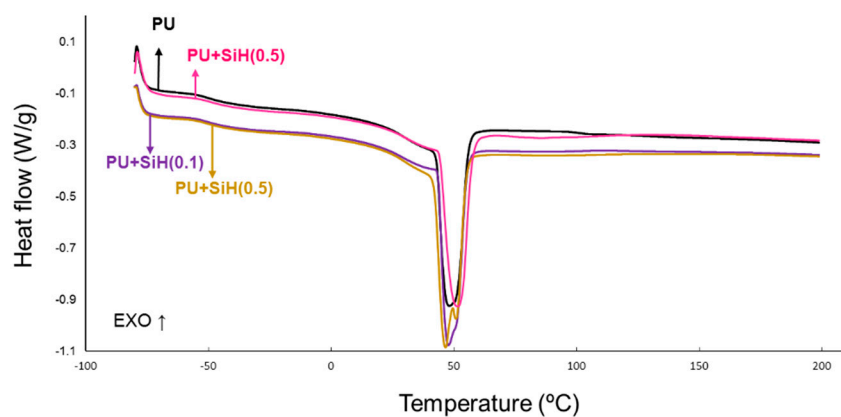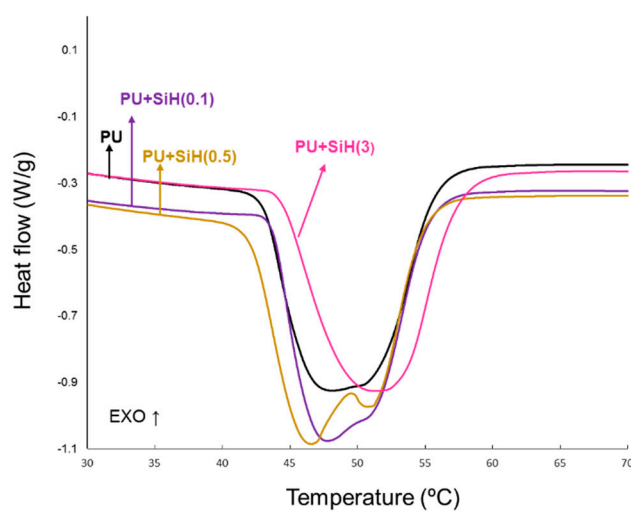

**Figure S5.** DSC curves of the PU and PU+nanosilica materials. First heating run. The figure below corresponds to the melting region of the DSC curves given above.

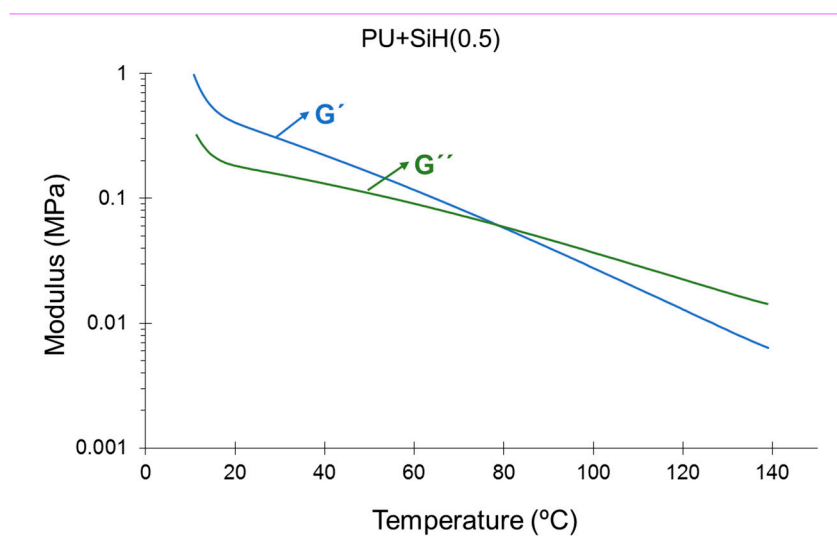

**Figure S6.** Variation of the storage ( $G'$ ) and loss ( $G''$ ) moduli as a function of the temperature for PU+SiH(0.5).

**Table S1.** Mean particle sizes of the waterborne polyurethane dispersions without and with different amounts of nanosilica.

| Dispersion   | Particle size<br>(nm) | Percentage<br>(%) | Particle size<br>(nm) | Percentage<br>(%) | Particle size<br>(nm) | Percentage<br>(%) |
|--------------|-----------------------|-------------------|-----------------------|-------------------|-----------------------|-------------------|
| Nanosilica   | 8                     | <0.5              | 140                   | 12                | 768                   | 88                |
| PUD          | 212                   | 67                | 253                   | 22                | 297                   | 11                |
| PUD+SiH(0.1) | 212                   | 32                | -                     | -                 | 290                   | 68                |
| PUD+SiH(0.5) | 202                   | 46                | 265                   | 54                | -                     | -                 |
| PUD+SiH(3)   | 209                   | 45                | 266                   | 55                | -                     | -                 |

**Table S2.** Crystallization temperatures and enthalpies of the PU and PU+nanosilica materials. DSC curves. Cooling run.

| Property              | PU | PU+SiH(0.1) | PU+SiH(0.5) | PU+SiH(3) |
|-----------------------|----|-------------|-------------|-----------|
| T <sub>c</sub> (°C)   | -7 | 1           | 0           | 2         |
| ΔH <sub>c</sub> (J/g) | 30 | 35          | 33          | 34        |

**Table S3.** Temperatures and weight losses of the thermal decompositions of the PU and PU+nanosilica materials. DTGA experiments.

|                              | PU  | PU+SiH(0.1) | PU+SiH(0.5) | PU+SiH(3) |
|------------------------------|-----|-------------|-------------|-----------|
| T <sub>1</sub> (°C)          | 55  | 53          | 54          | 52        |
| Weight loss <sub>1</sub> (%) | 1   | <1          | <1          | <1        |
| T <sub>2</sub> (°C)          | 241 | 300         | 293         | -         |
| Weight loss <sub>2</sub> (%) | 11  | 8           | 9           | -         |
| T <sub>3</sub> (°C)          | 329 | 324         | 325         | 356       |
| Weight loss <sub>3</sub> (%) | 66  | 12          | 22          | 42        |
| T <sub>4</sub> (°C)          | 392 | 361         | 369         | 384       |
| Weight loss <sub>4</sub> (%) | 9   | 73          | 60          | 49        |
| T <sub>5</sub> (°C)          | 436 | 441         | 440         | 442       |
| Weight loss <sub>4</sub> (%) | 5   | 4           | 4           | 3         |
